# Supplementary material for: Effectiveness of a standard clinical training program in new graduate nurses’ competencies in Vietnam: A quasi-experimental longitudinal study with a difference-in-differences design
Source: PubMed Central journal article supplement (PMC8270421; doi:10.1371/journal.pone.0254238), 2021-07-09
Supplement: pone.0254238.s001.pdf [file pone.0254238.s001.pdf]

**Table 1. Basic Competency Standard for Vietnamese Nurses <sup>a</sup>**

| Domain                                                                                    | Competency                  | Competency indicator                                                                                                                                                                                 |
|-------------------------------------------------------------------------------------------|-----------------------------|------------------------------------------------------------------------------------------------------------------------------------------------------------------------------------------------------|
| <b>Domain 1: Patient care</b>                                                             |                             |                                                                                                                                                                                                      |
| 1                                                                                         | Data collection             | 1 Identify the health need of the individuals, families, population groups and/or communities. (hereafter refers to patients/clients)                                                                |
|                                                                                           |                             | 2 Explain the health status of the clients/groups.                                                                                                                                                   |
| 2                                                                                         | Assessment                  | 3 Collect and analyze information about health issues, disease to determine health problem and illness of individuals, families and communities.                                                     |
|                                                                                           |                             | 4 Make decisions of care for patients, families and communities safely and effectively.                                                                                                              |
|                                                                                           |                             | 5 Perform nursing interventions to support individuals, families and communities to respond to the problem health/disease in accordance with cultural beliefs of the patient, patient family.        |
|                                                                                           |                             | 6 Monitor the evolution of nursing interventions performed.                                                                                                                                          |
| 3                                                                                         | Nursing diagnosis           | 7 Analyze and identify priority patients/clients' needs of care.                                                                                                                                     |
|                                                                                           |                             | 8 Carry out appropriate nursing care to respond to priority needs/problems.                                                                                                                          |
| 4                                                                                         | Nursing plan development    | 9 Perform comprehensive and systematic nursing assessment.                                                                                                                                           |
|                                                                                           |                             | 10 Collect and record patients'/clients' information appropriately.                                                                                                                                  |
|                                                                                           |                             | 11 Analyze and explain the information exactly.                                                                                                                                                      |
|                                                                                           |                             | 12 Formulate a health needs based care plan on the basis of collaboration and agreement with patients/clients, their family and team other members on the priority issues and clients' expectations. |
|                                                                                           |                             | 13 Explain nursing interventions for patients, families and implement planned nursing care in a manner that ensures safety, comfort and efficiency for patients.                                     |
|                                                                                           |                             | 14 Instruct patient/family to perform appropriate self-care.                                                                                                                                         |
|                                                                                           |                             | 15 Evaluate and adjust care plan based on the patient's health condition and expected outcomes.                                                                                                      |
|                                                                                           |                             | 16 Perform necessary support for discharged patients.                                                                                                                                                |
|                                                                                           |                             | 17 Provide health education on disease prevention to patients.                                                                                                                                       |
|                                                                                           |                             | 18 Deploy safety measures in all aspects of patients/clients care.                                                                                                                                   |
|                                                                                           |                             | 19 Create a convenient environment for patients.                                                                                                                                                     |
| 5                                                                                         | Privacy protection          | 20 Ensure privacy while providing care to patients.                                                                                                                                                  |
|                                                                                           |                             | 21 Comply with steps of nursing process in the professional scopes.                                                                                                                                  |
| 6                                                                                         | Proper care delivery        | 22 Implement nursing techniques skillfully.                                                                                                                                                          |
|                                                                                           |                             | 23 Follow the rules of infection control.                                                                                                                                                            |
| 7                                                                                         | Medication administration   | 24 Take a complete patient's drug history.                                                                                                                                                           |
|                                                                                           |                             | 25 Comply with rules while administering medication to patients.                                                                                                                                     |
|                                                                                           |                             | 26 Explain and instruct patient about the drugs that is given to her/him.                                                                                                                            |
|                                                                                           |                             | 27 Detect and perform necessary intervention if the patient had any drug reactions and report promptly to doctor and nurse in charge.                                                                |
|                                                                                           |                             | 28 Be aware of potential drug - drug or drug-food interactions.                                                                                                                                      |
|                                                                                           |                             | 29 Evaluate the effects of medication.                                                                                                                                                               |
|                                                                                           |                             | 30 Document and inform well drugs administered to patient.                                                                                                                                           |
| 8                                                                                         | Care continuity             | 31 Hand over the patient's status to the next care team appropriately.                                                                                                                               |
|                                                                                           |                             | 32 Collaborate with patients, families and other team members effectively to ensure continuity of care.                                                                                              |
| 9                                                                                         | First aids                  | 33 Set up necessary measures to implement continuous care for patients.                                                                                                                              |
|                                                                                           |                             | 34 Detect in time sudden changes in health condition of patients/clients.                                                                                                                            |
| 10                                                                                        | Rapport with patients       | 35 Give emergency interventions promptly and appropriately.                                                                                                                                          |
|                                                                                           |                             | 36 Coordinate with other health team members effectively.                                                                                                                                            |
|                                                                                           |                             | 37 Perform effective first aid for patients/clients.                                                                                                                                                 |
| 11                                                                                        | Interpersonal communication | 38 Create trust and confidence for patients/clients, families and team members.                                                                                                                      |
|                                                                                           |                             | 39 Spend adequate time for communication with client/significant others and team members.                                                                                                            |
| 12                                                                                        | ICT Skills                  | 40 Listen actively to patients/family's concerns, complaints.                                                                                                                                        |
|                                                                                           |                             | 41 Identify patients/client's feelings and psychological needs through his/her body language and facial expressions.                                                                                 |
|                                                                                           |                             | 42 Communicate effectively with individuals, families and communities that have limitations in communication due to disease or psychological problems.                                               |
|                                                                                           |                             | 43 Express words, gestures that motivate, encourage and comfort patients/clients.                                                                                                                    |
| 13                                                                                        | Intelligible explanation    | 44 Demonstrate understanding of culture, belief of patients/clients, families and community when communicate with them.                                                                              |
|                                                                                           |                             | 45 Utilize audio-visual facilities available to support communication with patients/clients, families and communities.                                                                               |
| 14                                                                                        | Health education            | 46 Utilize effectively and appropriately communication methods with patients/clients, families and communities.                                                                                      |
|                                                                                           |                             | 47 Define appropriate information needed to inform to patient/family.                                                                                                                                |
| 15                                                                                        | Teamworking                 | 48 Make psychological preparation for patients/clients and families before inform them the "bad" news.                                                                                               |
|                                                                                           |                             | 49 Collect and analyze information on the needs of health education of individuals, families and communities.                                                                                        |
|                                                                                           |                             | 50 Identify needs and content of information needed to provide to patients, families and communities.                                                                                                |
|                                                                                           |                             | 51 Develop health education plan fitting with socio-cultural features, beliefs of patients, families and communities.                                                                                |
|                                                                                           |                             | 52 Develop health education materials fitting with patients, families and communities.                                                                                                               |
|                                                                                           |                             | 53 Perform health education for individuals, families and groups appropriately and effectively.                                                                                                      |
|                                                                                           |                             | 54 Perform evaluation effects of health education and adjust it necessarily.                                                                                                                         |
| 55 Maintain good relationship with other team members, consider patient as a team member. |                             |                                                                                                                                                                                                      |
| 16                                                                                        | Documentation               | 56 Collaborate well with team member in order to make appropriate decisions for quality improvement.                                                                                                 |
|                                                                                           |                             | 57 Recommend appropriate intervention to improve client care.                                                                                                                                        |
|                                                                                           |                             | 58 Respect the role and views/opinions of other team members.                                                                                                                                        |
|                                                                                           |                             | 59 Share information with other team members.                                                                                                                                                        |
|                                                                                           |                             | 60 Act as representative and advocacy role to protect patients'/clients' right and safety.                                                                                                           |
|                                                                                           |                             | 61 Apply principles of management and storage of medical records regulated by the law and by MOH.                                                                                                    |
|                                                                                           |                             | 62 Keep information written in medical records confidentially.                                                                                                                                       |
|                                                                                           |                             | 63 Record information in medical record accuracy and timely.                                                                                                                                         |
| 17                                                                                        | Care management             | 64 Use collected data about patient's health status as the basis to develop policy and to facilitate care activities provided to patients.                                                           |
|                                                                                           |                             | 65 Manage individual tasks and time scientifically and effectively.                                                                                                                                  |
|                                                                                           |                             | 66 Identify tasks or activities need be done based on degree of priority.                                                                                                                            |
|                                                                                           |                             | 67 Organize, coordinate, delegate tasks for team member scientifically and effectively.                                                                                                              |
| 18                                                                                        | Medical equipment           | 68 Demonstrate understanding of the relationship between management and utilization of resources effectively to ensure quality and safe care for patients/clients.                                   |
|                                                                                           |                             | 69 Use informatics technology for management, for care of patients and for updated information.                                                                                                      |
|                                                                                           |                             | 70 Establish mechanism to manage and operate equipment for patients/clients care and treatment.                                                                                                      |
| 19                                                                                        | Resource management         | 71 Plan for preventive maintenance program.                                                                                                                                                          |
|                                                                                           |                             | 72 Operate equipment, facilities used for nursing care to ensure safety, effectiveness and prevent health care associated infections.                                                                |
| 20                                                                                        | Working environment         | 73 Identify the cost-effectiveness in the utilization of resources.                                                                                                                                  |
|                                                                                           |                             | 74 Develop budget proposal and deploy the plan to use resources for patient's care needs effectively.                                                                                                |
| 21                                                                                        | Quality improvement         | 75 Comply with standards and safety codes prescribed by laws.                                                                                                                                        |
|                                                                                           |                             | 76 Adhere to policies, procedures and protocols on prevention and control of infection.                                                                                                              |
|                                                                                           |                             | 77 Comply to rules and regulations regarding care environment. (water, air and noise)                                                                                                                |
|                                                                                           |                             | 78 Comply with regulations regarding management and treatment of wastes.                                                                                                                             |
|                                                                                           |                             | 79 Define steps to follow in case of fire, earthquake and other emergency situations.                                                                                                                |
|                                                                                           |                             | 80 Demonstrate understanding on areas related to occupational health and legal documents on safe working environment.                                                                                |
|                                                                                           |                             | 81 Be aware of the necessity of quality assurance activities, quality improvement through feedback and evaluation of regular practice.                                                               |
|                                                                                           |                             | 82 Detect and reports environmental risks in patient care and make appropriate corrective action.                                                                                                    |
|                                                                                           |                             | 83 Solicits feedback from patients/clients and significant others regarding care rendered.                                                                                                           |
|                                                                                           |                             | 84 Apply proper methods to improve quality of care.                                                                                                                                                  |
| 22                                                                                        | Evidence based practice     | 85 Participate in quality improvement activities in health care centre.                                                                                                                              |
|                                                                                           |                             | 86 Share with the team member relevant information regarding patients/clients' condition and significant changes in patients/clients' environment.                                                   |
|                                                                                           |                             | 87 Review nursing care plan to improve quality of care as well as minimize potential shortcomings.                                                                                                   |
|                                                                                           |                             | 88 Make appropriate proposals of means for care and preventions.                                                                                                                                     |
|                                                                                           |                             | 89 Apply scientific evidences in nursing care to improve safety for patients.                                                                                                                        |
|                                                                                           |                             | 90 Define and select research areas or research questions that are necessary, reasonable and feasible.                                                                                               |
|                                                                                           |                             | 91 Apply appropriate methods to conduct selected research issues.                                                                                                                                    |
| 23                                                                                        | Professional development    | 92 Apply appropriate statistical methods to analyze and interpret collected.                                                                                                                         |
|                                                                                           |                             | 93 Recommend appropriate research result based solutions.                                                                                                                                            |
|                                                                                           |                             | 94 Present research findings to colleagues, patients and related persons.                                                                                                                            |
|                                                                                           |                             | 95 Utilize research findings in nursing practice to improve quality of nursing practice.                                                                                                             |
|                                                                                           |                             | 96 Identify own learning needs, strengths, weaknesses/ limitations.                                                                                                                                  |
|                                                                                           |                             | 97 Pursue continuing education, participates in formal and non- formal education; Apply learned information for the improvement of care.                                                             |
| 24                                                                                        | Legal compliance            | 98 Get involved in professional organizations and civic activities.                                                                                                                                  |
|                                                                                           |                             | 99 Project a professional image of the nurse, demonstrate good manners and right conduct at all times.                                                                                               |
|                                                                                           |                             | 100 Possess positive attitude towards change and criticism, listen to suggestions and recommendations, try new strategies or approaches and adapt to changes willingly.                              |
|                                                                                           |                             | 101 Perform function according to professional standards.                                                                                                                                            |
|                                                                                           |                             | 102 Contribute to improve training and professional development for colleagues.                                                                                                                      |
|                                                                                           |                             | 103 Contribute to improve the role and status of nursing profession in the health sector and in society.                                                                                             |
|                                                                                           |                             | 104 Practice in accordance with the laws related to health, regulations of the Health Ministry and nursing practice.                                                                                 |
|                                                                                           |                             | 105 Compliance with the provisions of the work base.                                                                                                                                                 |
|                                                                                           |                             | 106 Implement codes of conduct of the unit/organization and law.                                                                                                                                     |
|                                                                                           |                             | 107 Record and keep care records and documents related to the patient, the health problems of patients in accordance with the standard care practices.                                               |
| 25                                                                                        | Moral responsibility        | 108 Accept responsibility and accountability for own decision and care interventions.                                                                                                                |
|                                                                                           |                             | 109 Compliance with national and international standards of professional ethics in nursing practice .                                                                                                |
|                                                                                           |                             | 110 Report the violation to the competent agencies and take responsible for that report.                                                                                                             |
| <b>Domain 2: Management and professional development</b>                                  |                             |                                                                                                                                                                                                      |
| <b>Domain 3: Legal and ethics</b>                                                         |                             |                                                                                                                                                                                                      |

<sup>a</sup> The categories of domains, competencies, and competency indicators are described based on The Basic Competency Standard for Vietnamese Nurse. (27)
